# Supplementary material for: Cardiorespiratory fitness, occupational aerobic workload and age: workplace measurements among blue-collar workers
Source: Springer Nature journal article supplement (doi:10.1007/s00420-020-01596-5), 2020-11-08
Supplement: MOESM1 [file 18565686]

# Cardiorespiratory fitness, occupational aerobic workload and age: workplace measurements among blue-collar workers

## Online Appendix

**Table A1. Cardiorespiratory Fitness and Aerobic Workload of Danish workers stratified by Age, Occupation and Work Pace**

|                               | Cardiorespiratory<br>Fitness<br>(mlO <sub>2</sub> /min/kg)<br>[mean (SD)] | Mean %HRR at<br>work<br>[mean (SD)] | Maximum<br>%HRR at work<br>[mean (SD)] | Proportion of time<br>spent at work above<br>30%HRR<br>[median (IQR)] |
|-------------------------------|---------------------------------------------------------------------------|-------------------------------------|----------------------------------------|-----------------------------------------------------------------------|
| <b>Age</b>                    |                                                                           |                                     |                                        |                                                                       |
| ≤37 (n = 111)                 | 35 (9.9)                                                                  | 31 (7.5)                            | 59 (10.7)                              | 50% (30% to 71%)                                                      |
| 38 to 45 (n = 121)            | 32 (8.9)                                                                  | 29 (7.2)                            | 56 (10.5)                              | 39% (22% to 65%)                                                      |
| 46 to 51 (n = 112)            | 31 (7.8)                                                                  | 20 (7.1)                            | 57 (10.6)                              | 46% (20% to 71%)                                                      |
| ≥52 (n = 95)                  | 29 (7.5)                                                                  | 29 (7.7)                            | 56 (9.4)                               | 40% (22% to 68%)                                                      |
| <b>Occupation</b>             |                                                                           |                                     |                                        |                                                                       |
| Administration (n = 68)       | 33 (8.5)                                                                  | 26 (7.4)                            | 56 (11.4)                              | 24% (11% to 45%)                                                      |
| Cleaning (n = 42)             | 31 (9.3)                                                                  | 35 (6.5)                            | 61 (12.2)                              | 70% (55% to 83%)                                                      |
| Manufacturing (n = 293)       | 32 (9.1)                                                                  | 30 (6.7)                            | 56 (9.5)                               | 46% (23% to 68%)                                                      |
| Transportation (n = 36)       | 32 (8.2)                                                                  | 32 (9.2)                            | 63 (10.2)                              | 53% (36% to 73%)                                                      |
| <b>Work pace (steps/hour)</b> |                                                                           |                                     |                                        |                                                                       |
| <844.6 (n = 110)              | 32 (8.8)                                                                  | 25 (6.9)                            | 54 (10.9)                              | 25% (9% to 44%)                                                       |
| 844.6 to 1165.9 (n = 109)     | 32 (7.8)                                                                  | 28 (6.0)                            | 55 (9.2)                               | 34% (21% to 52%)                                                      |
| 1165.9 to 1492.7 (n = 110)    | 32 (9.4)                                                                  | 31 (6.3)                            | 58 (9.8)                               | 54% (30% to 71%)                                                      |
| >1492.7 (n = 110)             | 32 (9.6)                                                                  | 34 (7.1)                            | 60 (10.4)                              | 68% (51% to 85%)                                                      |

HRR Heart rate reserve; SD Standard deviation; IQR Interquartile range
